# Supplementary material for: A weighted genetic risk score using all known susceptibility variants to estimate rheumatoid arthritis risk
Source: HighWire-hosted journal article supplement (doi:10.1136/annrheumdis-2013-204133), 2013-10-04
Supplement: annrheumdis-2013-204133supp.pdf [file annrheumdis-2013-204133supp.pdf]

## **Supplementary note**

### **Sample collections**

#### **United Kingdom (UK)**

UK samples were recruited from across the UK, all cases were Caucasian of Northern European descent and fulfilled 1987 American College of Rheumatology (ACR) classification criteria modified for genetic studies. All participants gave informed consent and the study was approved by the North West ethics committee (MRC 99/8/84). Serum RF and ACPA antibody titre were measured using commercially available kits [RF-PAIA Immunoturbidimetric Assay for rheumatoid factor, Diastat<sup>TM</sup> ACPA Kit (Axis-Shield Diagnostics Limited, UK)]. Patients with titres  $\geq 40$  units/ml and  $\geq 5$  units/ml were defined as positive for RF and ACPA antibodies, respectively

#### **Sweden EIRA**

Swedish samples were from the Swedish epidemiological and genetic study of RA (EIRA) described elsewhere [1], controls were matched by date of birth, sex and residential area. All rheumatoid arthritis patients met the ACR 1987 revised criteria for rheumatoid arthritis. Blood samples were collected at 19 rheumatology units across Sweden (mainly middle and south of country). Ethics permit was received and informed consent was registered according to the current Swedish law.

#### **Sweden UMEA**

Samples were also selected from the Swedish Umea cohort is an inception cohort of RA patients from the four most northern counties of Sweden, controls are randomly selected, matched for age and sex and ethnicity, from the population based Medical Biobank of Northern Sweden. All patients met ACR 1987 criteria. Detection of Anti-Cyclic citrullinated peptide antibodies was analysed using enzyme-linked immunoassays (Euro-Diagnostica, Malmö, Sweden) according to manufacturer's instructions. Cut-off for positivity was 25 AU/ml. The regional Ethics Committee at the University Hospital of UMEA approved this study and all participants gave their written informed consent.

#### **United States (US)**

Cases from the US were selected from three major datasets; The NARAC cases were largely defined from families with RA affected sibling pairs supplemented with singleton subjects whose siblings did not meet criteria for study entry, US singleton RA subjects and subjects from trio families [2, 3]. A second selected group of ACPA+ patients recruited by Dr Fredrick Wolfe in his practice as well as RA patients enrolled in a published inception cohort and patients followed in the

national database for rheumatic diseases directed by Dr Wolfe [4]. A third cohort of subjects were derived from an inception cohort study SONORA as described previously [5].

### **Spain**

Spanish RA patients were recruited across Spain fulfilling 1987 ACR criteria; the controls were obtained from the Spanish DNA bank and were matched by age and gender. Both patients and controls were white of southern European descent. All participants were recruited after providing informed consent.

### **The Netherlands**

Patients were included from Leiden early arthritis clinic (Leiden-EAC) [6], only patients diagnosed with RA according to 1987 ACR criteria within one year after inclusion in the Leiden-EAC were included in this study. The study was approved by the local ethical committee and all patients gave informed consent. Controls were obtained from blood donors.

## REFERENCES

- 1 Sverdrup B, Kallberg H, Bengtsson C et al. Association between occupational exposure to mineral oil and rheumatoid arthritis: results from the Swedish EIRA case-control study. *Arthritis Res Ther* 2005;**7**:R1296-R1303.
- 2 Gregersen PK. The North American Rheumatoid Arthritis Consortium--bringing genetic analysis to bear on disease susceptibility, severity, and outcome. *Arthritis Care Res* 1998;**11**:1-2.
- 3 Jawaheer D, Seldin MF, Amos CI et al. A genomewide screen in multiplex rheumatoid arthritis families suggests genetic overlap with other autoimmune diseases. *Am J Hum Genet* 2001;**68**:927-36.

- 4 Fries JF, Wolfe F, Apple R et al. HLA-DRB1 genotype associations in 793 white patients from a rheumatoid arthritis inception cohort: frequency, severity, and treatment bias. *Arthritis Rheum* 2002;**46**:2320-2329.
- 5 Sokka T, Willoughby J, Yazici Y et al. Databases of patients with early rheumatoid arthritis in the USA. *Clin Exp Rheumatol* 2003;**21**:S146-S153.
- 6 de Rooy DP, van der Linden MP, Knevel R et al. Predicting arthritis outcomes--what can be learned from the Leiden Early Arthritis Clinic? *Rheumatology (Oxford)* 2011;**50**:93-100.
